# Supplementary material for: A human immune data-informed vaccine concept elicits strong and broad T-cell specificities associated with HIV-1 control in mice and macaques
Source: PubMed Central journal article supplement (PMC4336696; doi:10.1186/s12967-015-0392-5), 2015-02-15
Supplement: 12967_2015_392_MOESM1_ESM.pdf [file 12967_2015_392_MOESM1_ESM.pdf]

**Supplementary Table 1. Fine-mapping of responses to linker-containing peptides in pDNA-HTI immunized mice<sup>a</sup>.**

| HTI segment junctions | HIV protein | # of HTI OLP | Sequence of OLP  | # of positive animals <sup>a</sup> |
|-----------------------|-------------|--------------|------------------|------------------------------------|
| S1-S2                 | Gag p24     | #27          | QKIEVAAAKAFSPEV  |                                    |
| S2-S3                 | Gag p24     | #31          | PMFSALAAAGHQAAM  |                                    |
| S3-S4                 | Gag p24     | #35          | MQMLKEAAAIAPGQM  |                                    |
| S3-S4                 | Gag p24     | #50          | KIVRMYSPTSIAAAAY | 1                                  |
| S4-S5 <sup>b</sup>    | Gag p24     | #51          | MYSPTSIAAAAYVDRF | 1                                  |
| S4-S5                 | Gag p24     | #52          | TSIAAAAYVDRFYKTL | 1                                  |
| S4-S5                 | Gag p24     | #55          | FYKTLRAEQAAA     | 1                                  |
| S5-S6 <sup>b</sup>    | Gag p24     | #56          | YKTLRAEQAAACQGV  | 1                                  |
| S5-S6                 | Gag p24     | #57          | RAEQAAACQGVGGPGH |                                    |
| S6-S7                 | Gag p24     | #61          | ARVLAAACTERQANF  |                                    |
| S7-S8                 | Prt         | #69          | FLQSRAAAKMIGGI   |                                    |
| S7-S8 <sup>b</sup>    | Prt         | #85          | TQIGCTLNFAALVEI  | 2                                  |
| S8-S9                 | RT          | #86          | CTLNFAALVEICTEM  | 2                                  |
| S8-S9                 | RT          | #87          | FAALVEICTEMEK    |                                    |
| S9-S10                | RT          | #91          | GKISKIAAALRWGF   |                                    |
| S10-S11               | RT          | #107         | KLVGKLAAAILKEPV  |                                    |
| S10-S11               | RT          | #116         | GQWTYQIYAAATKEL  |                                    |
| S11-S12               | Int         | #117         | YQIYAAATKELQKQI  |                                    |
| S11-S12               | Int         | #125         | PLWKGPAAKLLWAAAK |                                    |
| S11-S12               | Int         | #126         | GPAKLLWAAAKIIR   | 2                                  |
| S12-S13 <sup>b</sup>  | Int         | #127         | KLLWAAAKIIRDYGGK | 2                                  |
| S12-S13               | Int         | #128         | AAAKIIRDYGGKQMA  | 1                                  |
| S13-S14               | Vif         | #132         | DCVAAAVKHHMYISK  |                                    |
| S14-S15               | Vif         | #139         | STHPRAAAVTKL     |                                    |
| S15-S16               | Vif         | #145         | PQKTKGHRAAAWLEA  |                                    |

<sup>a</sup> Mice (N=6) were immunized 3 times with DNA-HTI and 4 of the animals with positive responses were used to fine-map the responses covering the linker-containing peptides.

<sup>b</sup> Alanine-linker including peptides that gave a positive response.
